# Supplementary material
Source: PubMed Central journal article supplement (PMC6944474)
Supplement: MCB.00307-19-s0001.pdf [file MCB.00307-19-s0001.pdf]

**Supplementary Table 1. List of antibodies used in this study.**

| <b>Name</b>     | <b>Company</b>         | <b>Catalog #</b> |
|-----------------|------------------------|------------------|
| SOX9            | EMD Millipore          | AB5535           |
| ALDH1A1         | EMD Millipore          | MABN838          |
| $\beta$ -actin  | Sigma-Aldrich          | A5441            |
| GAPDH           | EMD Millipore          | CB1001           |
| anti-rabbit-HRP | Jackson ImmunoResearch | 711-035-152      |
| anti-mouse-HRP  | Jackson ImmunoResearch | 715-035-151      |



|                    |                        |                      |
|--------------------|------------------------|----------------------|
| ALDH1A1<br>prom-9  | ACTCTCAGAACGACTCAAGCAG | TTGCCATTGGAGCAGATGTG |
| ALDH1A1<br>prom-10 | AGCTTG TTCAGTCACTGCAC  | ACGCAAAGCTGATTGTGCTG |

**Supplementary Table 3. siRNA and shRNA sequences.**

| <b>Gene</b> | <b>Name</b> | <b>Sequence</b>       | <b>Dharmacon catalog #</b> |
|-------------|-------------|-----------------------|----------------------------|
| Control     | siCtl       | UGGUUUACAUGUCGACUAA   | D-001810-01                |
| SOX9        | siSOX9      | GAACGCACATCAAGACGGA   | D-059108-01                |
| SOX9        | sh-1        | TATACAGAAATTGAAGGATGC | RHS3979-201751501          |
| SOX9        | sh-2        | TTCATGTAGGTGAAGGTGGAG | RHS3979-201751503          |
